# Supplementary material for: Multi-Responsive Sensor Based on Porous Hydrogen-Bonded Organic Frameworks for Selective Sensing of Ions and Dopamine Molecules
Source: MDPI journal article supplement (doi:10.3390/molecules27248750), 2022-12-09
Supplement: s1 [file s1]

# Multi-responsive sensor based on porous hydrogen-bonded organic frameworks for selective sensing of ions and dopamine molecules

## 1. Experimental Details

### 1.1. Materials and general methods

All chemicals were obtained commercially and used without further processing and purification. The Powder X-ray diffraction (PXRD) patterns of HOF-TCBP were measured by X-ray diffractometer (D2 PHASER) with Cu K $\alpha$  radiation ( $\lambda=1.54056$  Å) at a scan rate of 5°/min and a scan range of 5° – 50°. Field emission scanning electron microscopy (FE-SEM) images were obtained by MODEL SU8010, Hitachi. The PL spectrum were obtained by F4600 fluorescence spectrometer. FT-IR was carried out on a Nicolet iS50 spectrometer from Thermo Fisher Scientific. UV-Vis absorption spectrum was recorded on Shimadzu UV-3600 spectrometer.

### 1.2. Synthesis of HOF-TCBP

Add 3,3',5,5'-tetrakis-(4-carboxyphenyl)-1,1'-biphenyl (H<sub>4</sub>TCBP) (100 mg, 0.158 mmol) and DMF (0.7 mL) to a 20 mL vial. After 10 minutes of sonication, let stand for several days, and let the liquid slowly evaporate and crystallize. Then, add 0.5 mL of DMF to dissolve and 5 mL of acetone for anti-dissolving, mix well, and filter. Finally, it was washed several times with acetone and air-dried to obtain a white powder.

### 1.3. Metal ion sensing

In metal ion sensing experiments, a 10 mg HOF-TCBP powder sample was weighed, then dispersed into 200 mL of ethanol solvent, and after sonication for 30 min, a HOF-TCBP suspension was obtained. Prepare a series of nitrate solutions A(NO<sub>3</sub>)<sub>x</sub> (10<sup>-3</sup>M, A = Ca<sup>2+</sup>, K<sup>+</sup>, Cd<sup>2+</sup>, Al<sup>3+</sup>, Co<sup>2+</sup>, Zr<sup>4+</sup>, Sc<sup>3+</sup>, Cu<sup>2+</sup>, Fe<sup>3+</sup>, Cr<sup>3+</sup>), according to the titration method, gradually add to 2 mL of the HOF-TCBP suspension, and then measure the fluorescence spectrum.

### 1.4. Anion sensing

For the anion sensing experiments, the sodium salt aqueous solutions of Ac, Br, Cl,  $\text{CO}_3^{2-}$ , F,  $\text{HPO}_4^{2-}$ ,  $\text{SiO}_3^{2-}$ ,  $\text{SO}_3^{2-}$ ,  $\text{SO}_4^{2-}$ ,  $\text{Cr}_2\text{O}_7^{2-}$  with a concentration of  $10^{-3}$  M were first prepared, and then different amounts of the above stock solutions were added to 2 mL HOF-TCBP suspension, respectively, and the luminescence data were collected after standing overnight. In the anti-interference experiment of  $\text{Cr}_2\text{O}_7^{2-}$ , 230  $\mu\text{L}$  of another nine anion solutions were added to 2 mL HOF-TCBP suspension, and then the  $\text{Cr}_2\text{O}_7^{2-}$  solution was added incrementally, and the luminescence data were collected after standing overnight.

### *1.5. Dopamine sensing*

Prepare a DA stock solution at a concentration of 10 mM. Meanwhile, the HOF-TCBP samples were dispersed in phosphate buffer solution (5 mg/100 mL) with pH 2 - 6, respectively, and ultrasonically treated for 30 min. Then 2 mL HOF-TCBP suspensions with different pH were taken respectively, and DA solution was added dropwise in order to measure the fluorescence spectrum. In addition, seven solutions were also prepared at a concentration of 10 mM, cysteine (Cys), phenylalanine (Phe), glutamic acid (Glu), urea (Urea), glucose (Glc), tryptophan (Trp) and aspartic acid (Asp) were added to 2 mL HOF-TCBP suspension at pH = 6, respectively, and the fluorescence was measured for selectivity experiments. The fetal bovine serum was diluted 30-fold before the measurement of the real sample fetal bovine serum.

## 2. Figures

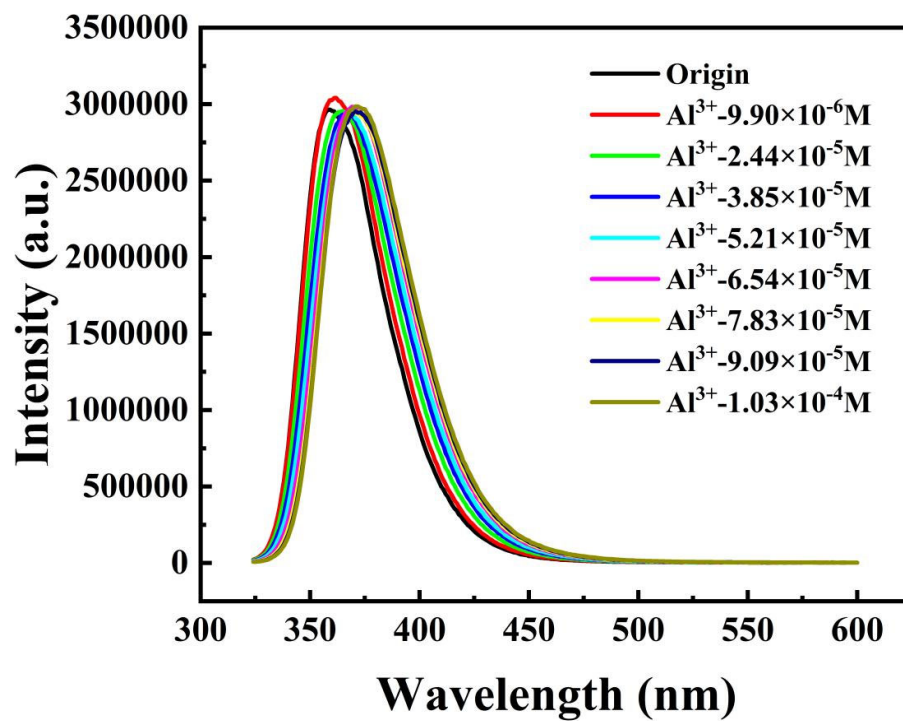

**Figure S1.** The PL spectrum of HOF-TCBP with different amounts of  $\text{Al}^{3+}$ .

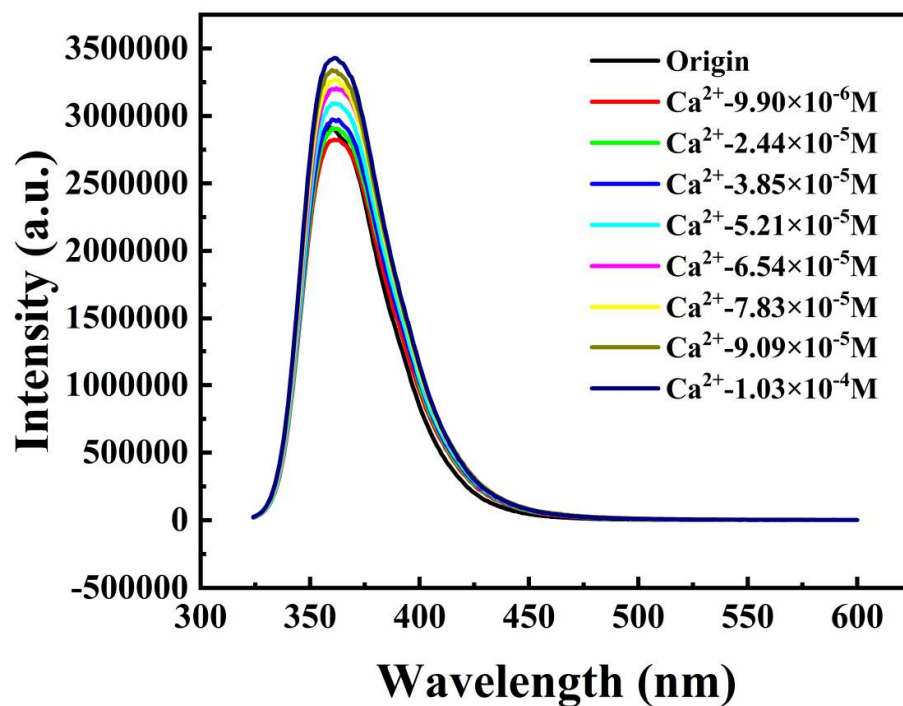

Figure S2. The PL spectrum of HOF-TCBP with different amounts of  $\text{Ca}^{2+}$ .

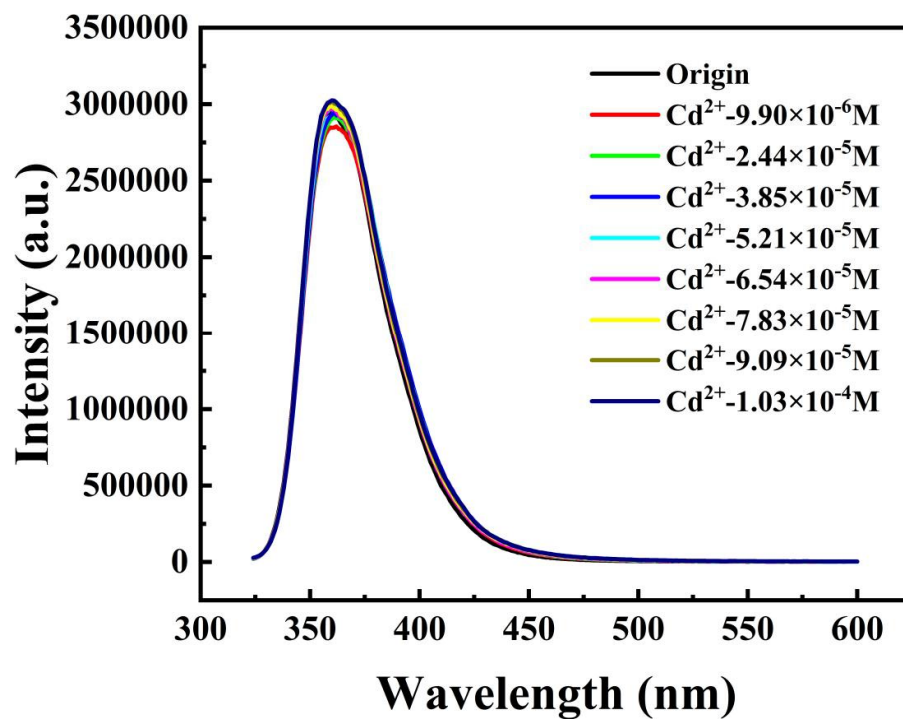

Figure S3. The PL spectrum of HOF-TCBP with different amounts of  $\text{Cd}^{2+}$ .



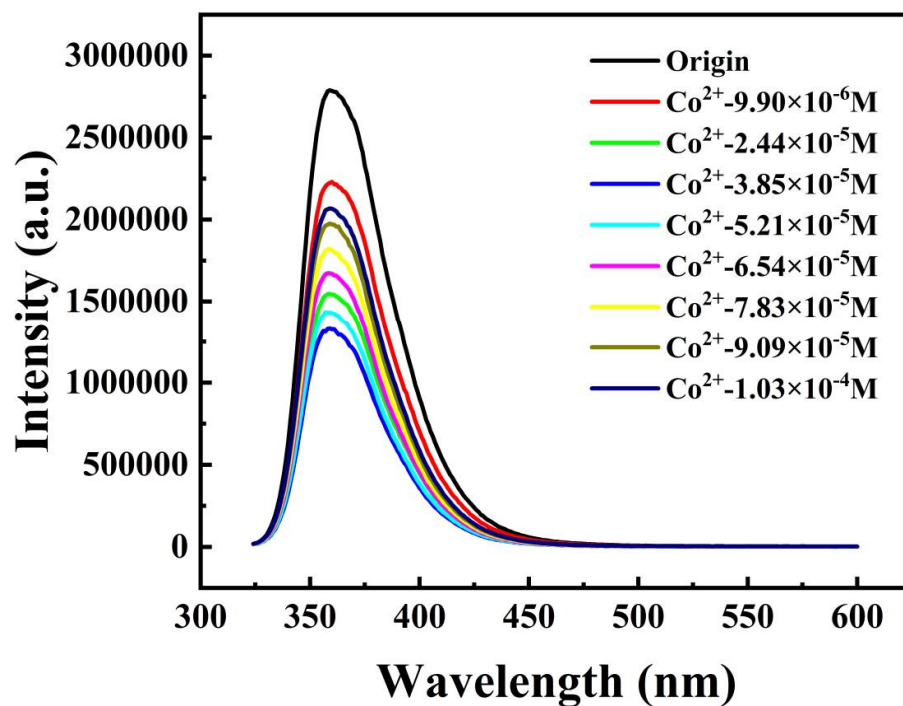

Figure S4. The PL spectrum of HOF-TCBP with different amounts of  $\text{Co}^{2+}$ .

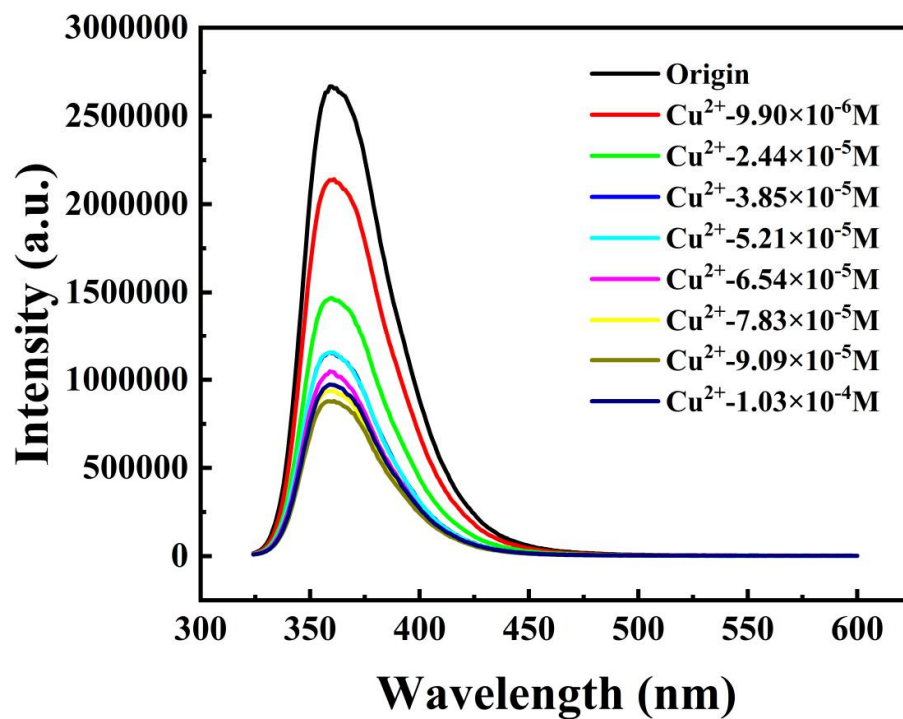

Figure S5. The PL spectrum of HOF-TCBP with different amounts of  $\text{Cu}^{2+}$ .

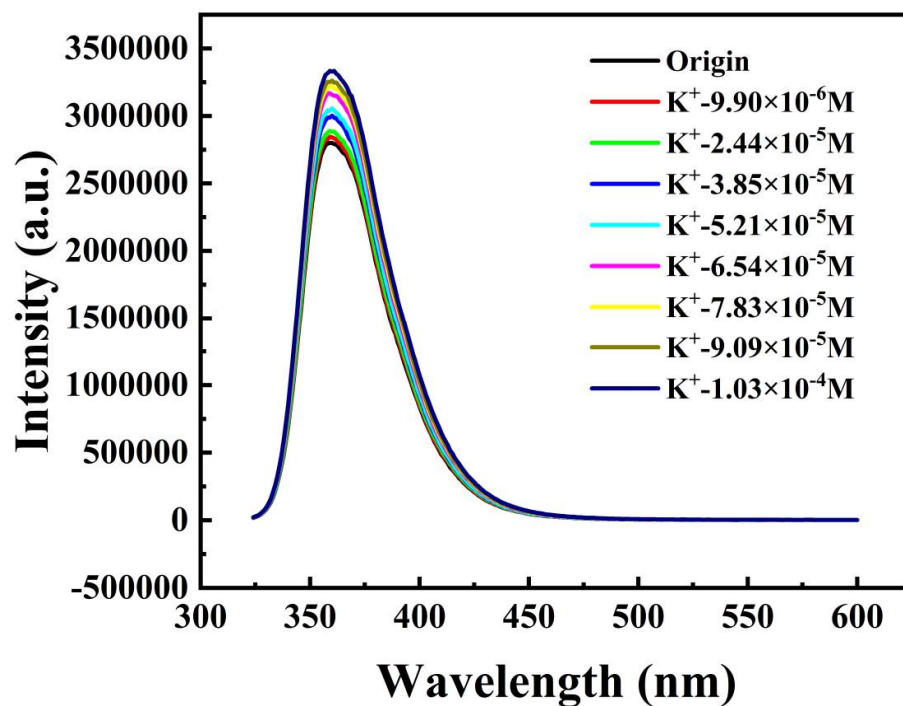

Figure S6. The PL spectrum of HOF-TCBP with different amounts of  $K^+$ .

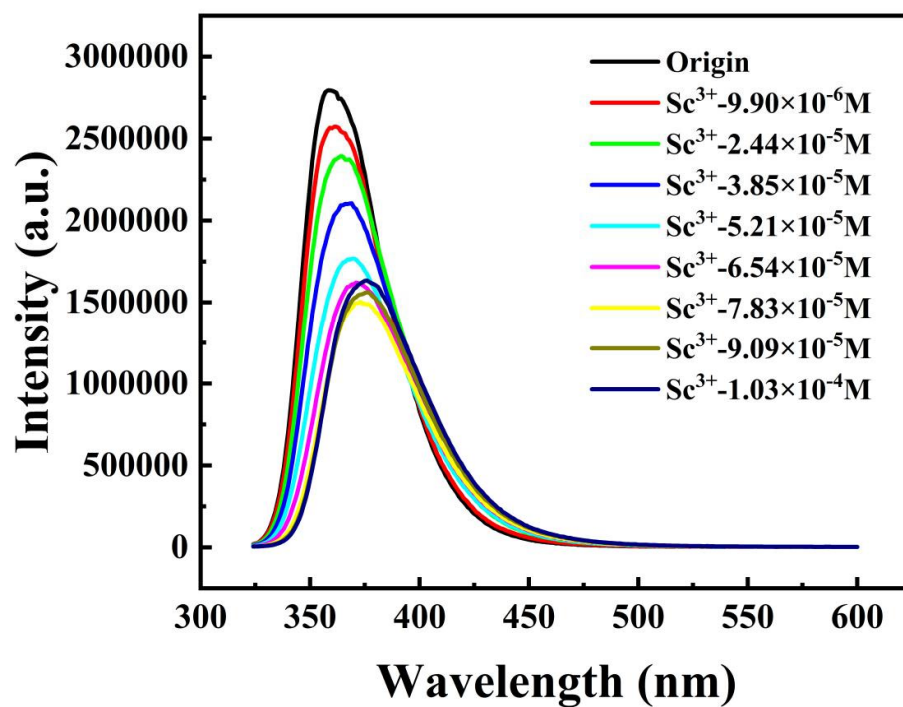

Figure S7. The PL spectrum of HOF-TCBP with different amounts of  $Sc^{3+}$ .

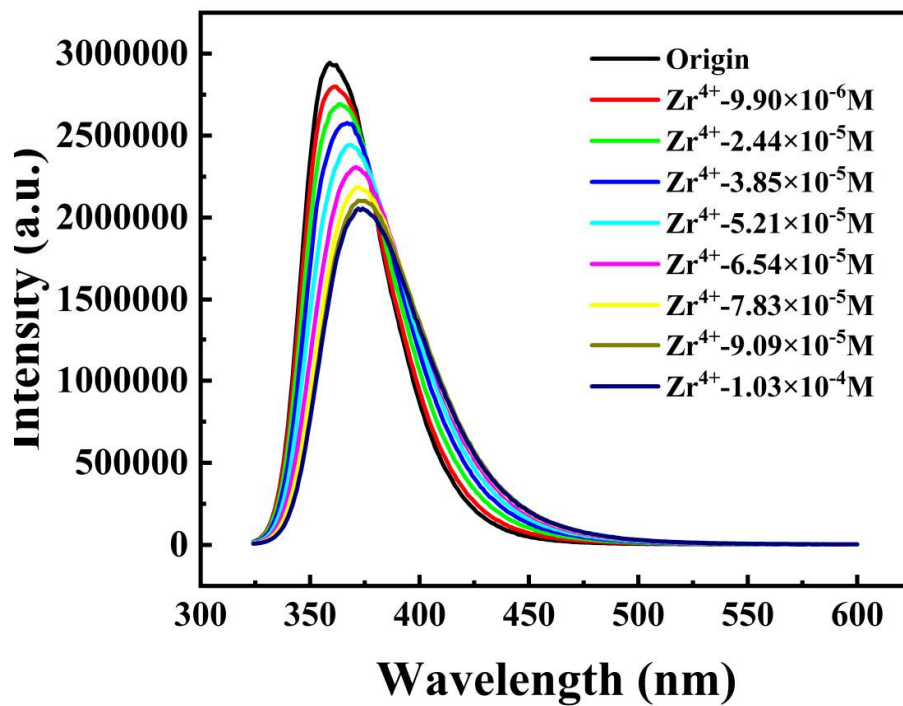

Figure S8. The PL spectrum of HOF-TCBP with different amounts of Zr<sup>4+</sup>.

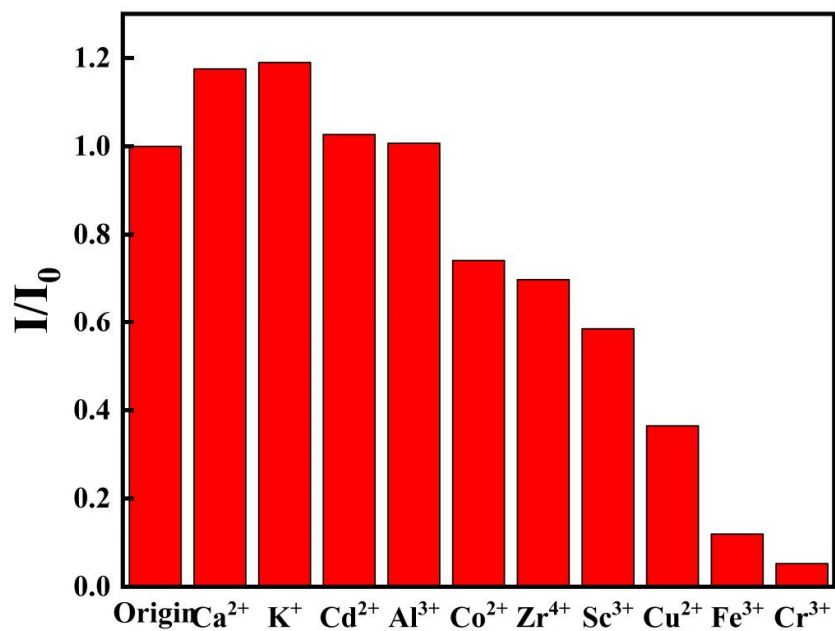

Figure S9. The 359 nm emission intensity of HOF-TCBP ethanol solution with  $1.0 \times 10^{-3}$  M different

metal ion.

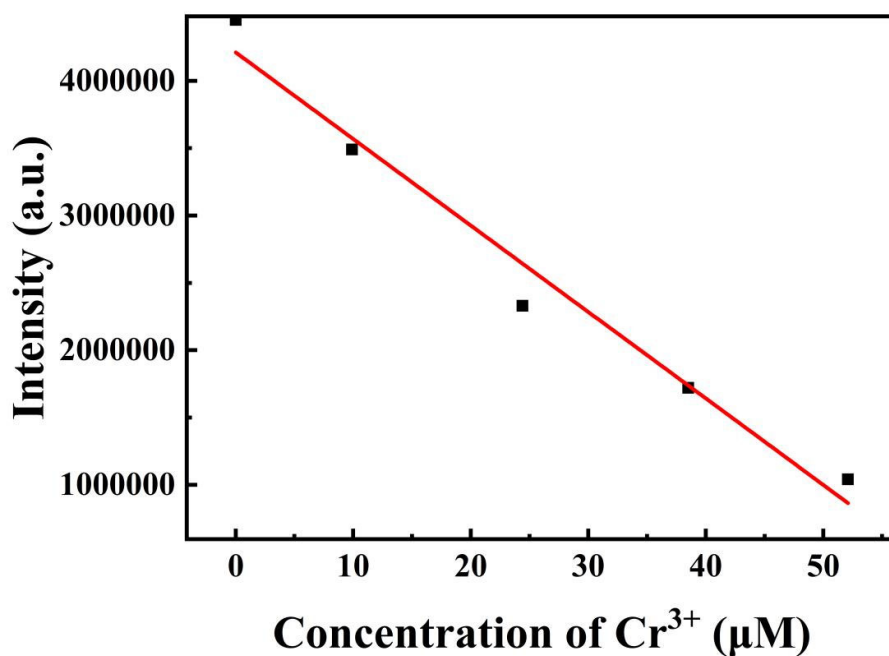

**Figure S10.** The fit curve of HOF-TCBP emission intensity at different Cr<sup>3+</sup> concentrations.

Linear Equation:  $Y = -64230.019X + 4211143.876$

$S = 6.4230019 \times 10^{10} \text{ M}^{-1}$

$$I_a = \frac{4229918 + 4218369 + 4221680 + 4194120 + 4191930 + 4198920 + 4197870 + 4196500 + 4199690 + 4184230}{10}$$

$$= 4203322.7$$

$$S_b = \sqrt{\frac{\sum (I_0 - I_a)^2}{N-1}} = 14751.90207 \quad (N=8)$$

$$\text{LOD} = \frac{3 \times S_b}{S} = \frac{3 \times 14751.90207}{6.4230019 \times 10^{10}} = 0.689 \text{ } \mu\text{M}$$

$S$  is the slope of the calibration curve,  $S_b$  is the standard deviation of the blank group,  $I_0$  is the fluorescence intensity of the HOF solution, and  $I_a$  is the average of  $I_0$ .

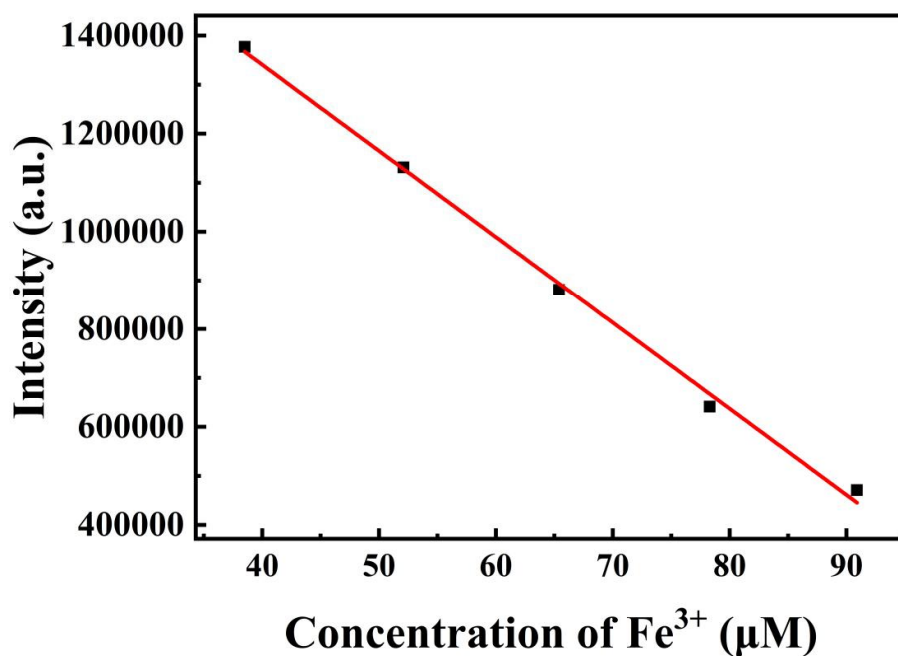

**Figure S11.** The fit curve of HOF-TCBP emission intensity at different Fe<sup>3+</sup> concentrations.

Linear Equation:  $Y = -17588.733X + 2044301.391$

$S = 1.7588733 \times 10^{10} \text{ M}^{-1}$

$I_a = \frac{4229918 + 4218369 + 4221680 + 4194120 + 4191930 + 4198920 + 4197870 + 4196500 + 4199690 + 4184230}{10}$

$= 4203322.7$

$S_b = \sqrt{\frac{\sum(I_0 - I_a)^2}{N-1}} = 14751.90207 \quad (N=8)$

$LOD = \frac{3 \times S_b}{S} = \frac{3 \times 14751.90207}{1.7588733 \times 10^{10}} = 2.516 \text{ μM}$

$S$  is the slope of the calibration curve,  $S_b$  is the standard deviation of the blank group,  $I_0$  is the fluorescence intensity of the HOF solution, and  $I_a$  is the average of  $I_0$ .

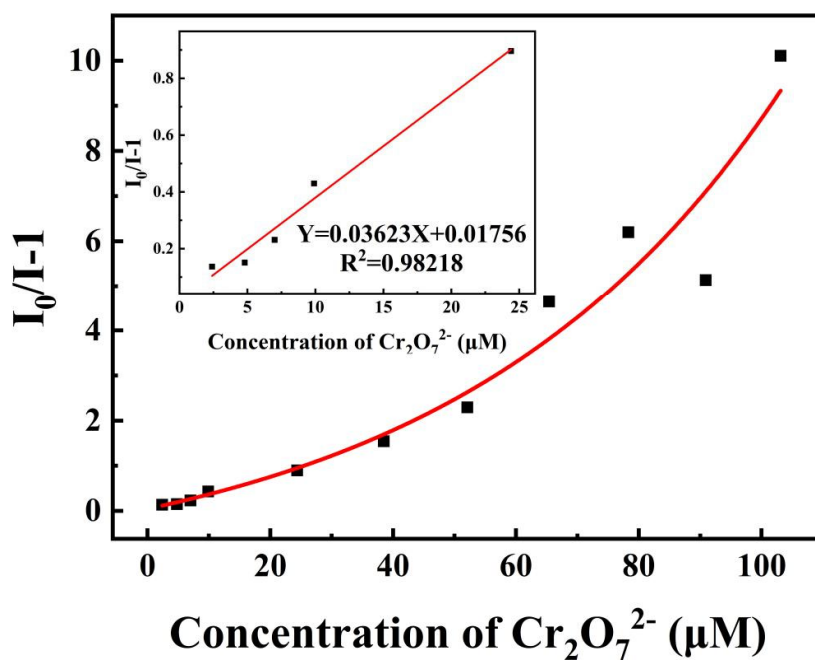

**Figure S12.** S-V plots of  $\text{Cr}_2\text{O}_7^{2-}$ ; inset: the above figures are the linear fitting curves at low concentrations.

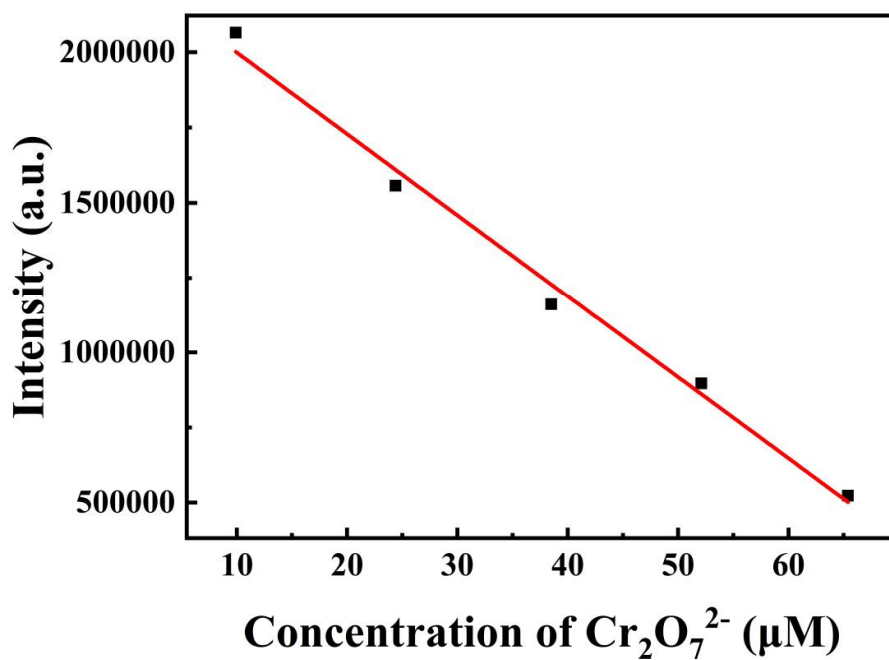

**Figure S13.** The fit curve of HOF-TCBP emission intensity at different  $\text{Cr}_2\text{O}_7^{2-}$  concentrations.

Linear Equation:  $Y=-27023.959X+2269090.727$

$S=2.7023959 \times 10^{10} \text{ M}^{-1}$

$$I_a = \frac{4229918+4218369+4221680+4194120+4191930+4198920+4197870+4196500+4199690+4184230}{10}$$

$$=4203322.7$$

$$S_b = \sqrt{\frac{\sum(I_0 - I_a)^2}{N-1}} = 14751.90207 \quad (N=8)$$

$$LOD = \frac{3 \times S_b}{S} = \frac{3 \times 14751.90207}{2.7023959 \times 10^{10}} = 1.638 \mu M$$

S is the slope of the calibration curve,  $S_b$  is the standard deviation of the blank group,  $I_0$  is the fluorescence intensity of the HOF solution, and  $I_a$  is the average of  $I_0$ .

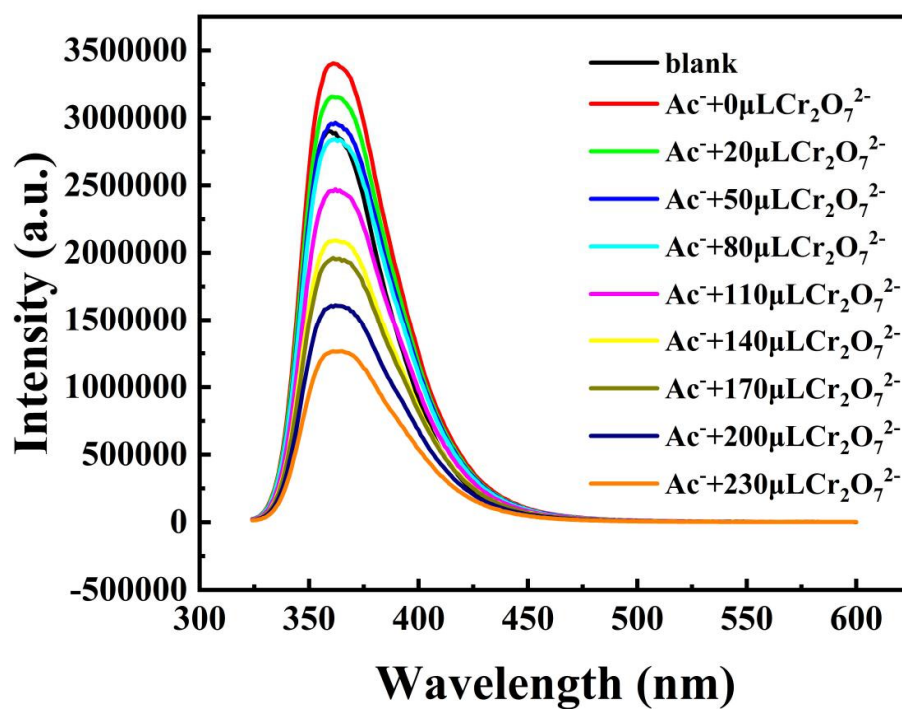

**Figure S14.** The change of fluorescence intensity of HOF-TCBP after adding Ac- (230  $\mu$ L,  $10^{-3}$  M) and different contents of  $Cr_2O_7^{2-}$  ( $10^{-3}$  M).

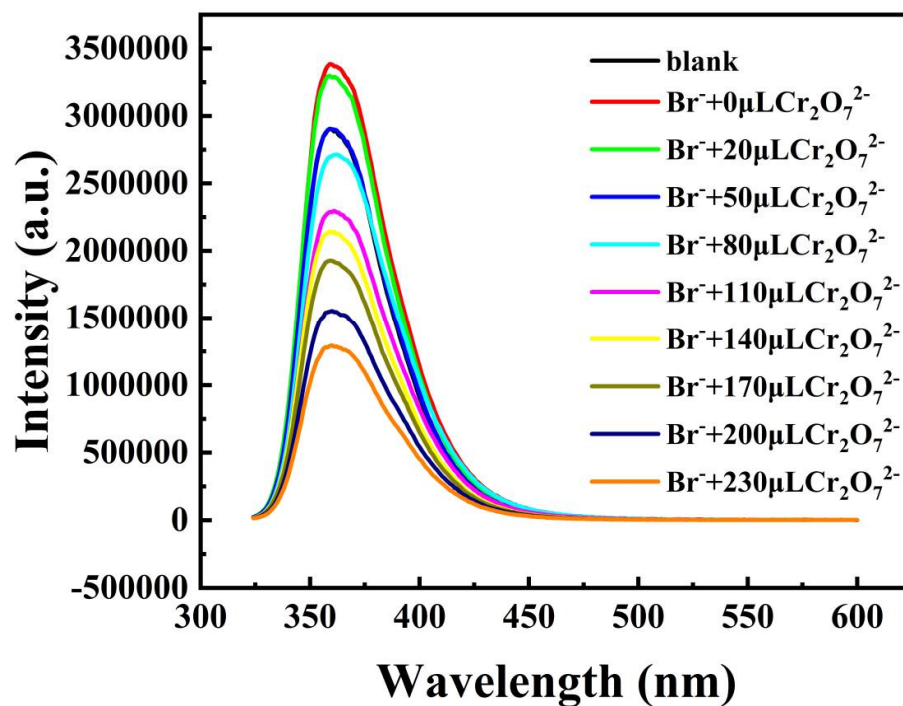

Figure S15. The change of fluorescence intensity of HOF-TCBP after adding  $\text{Br}^-$  (230  $\mu\text{L}$ ,  $10^{-3}$  M) and different contents of  $\text{Cr}_2\text{O}_7^{2-}$  ( $10^{-3}$  M).

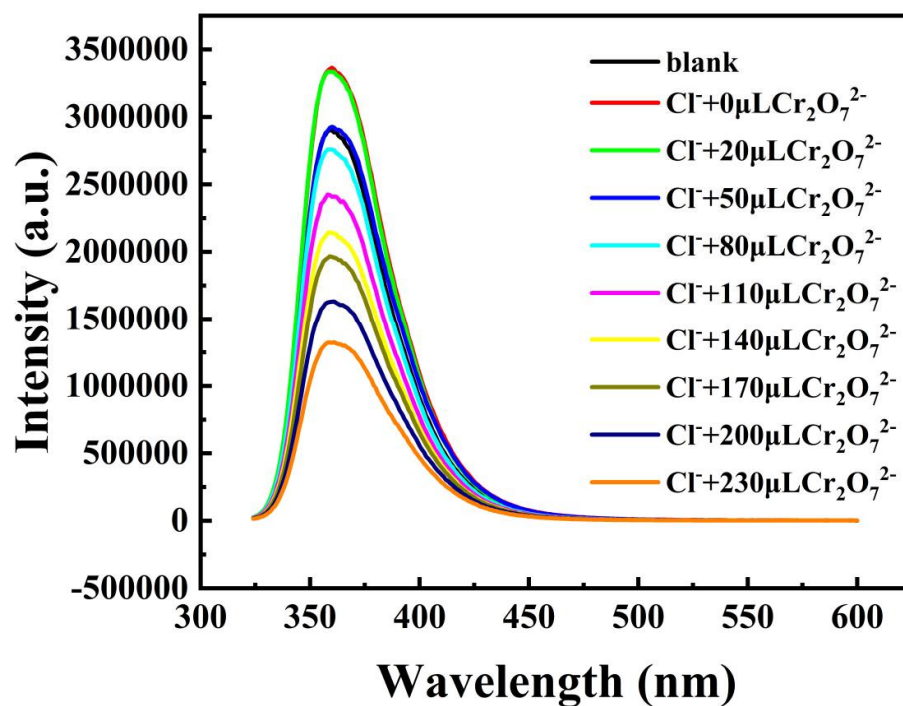

Figure S16. The change of fluorescence intensity of HOF-TCBP after adding  $\text{Cl}^-$  (230  $\mu\text{L}$ ,  $10^{-3}$  M) and



different contents of  $\text{Cr}_2\text{O}_7^{2-}$  ( $10^{-3}$  M).

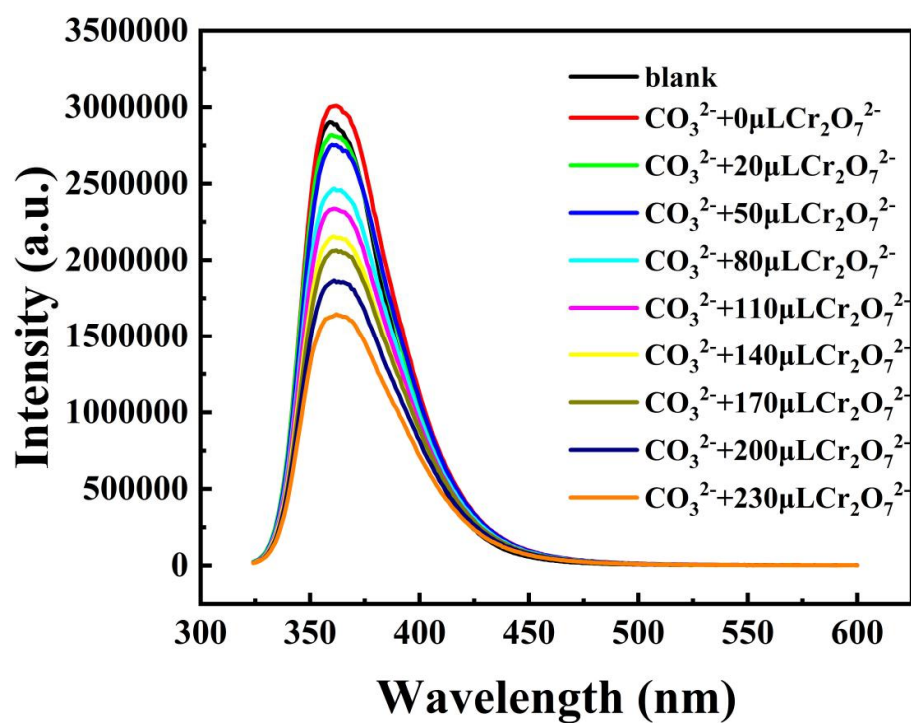

**Figure S17.** The change of fluorescence intensity of HOF-TCBP after adding  $\text{CO}_3^{2-}$  (230  $\mu\text{L}$ ,  $10^{-3}$  M) and different contents of  $\text{Cr}_2\text{O}_7^{2-}$  ( $10^{-3}$  M).

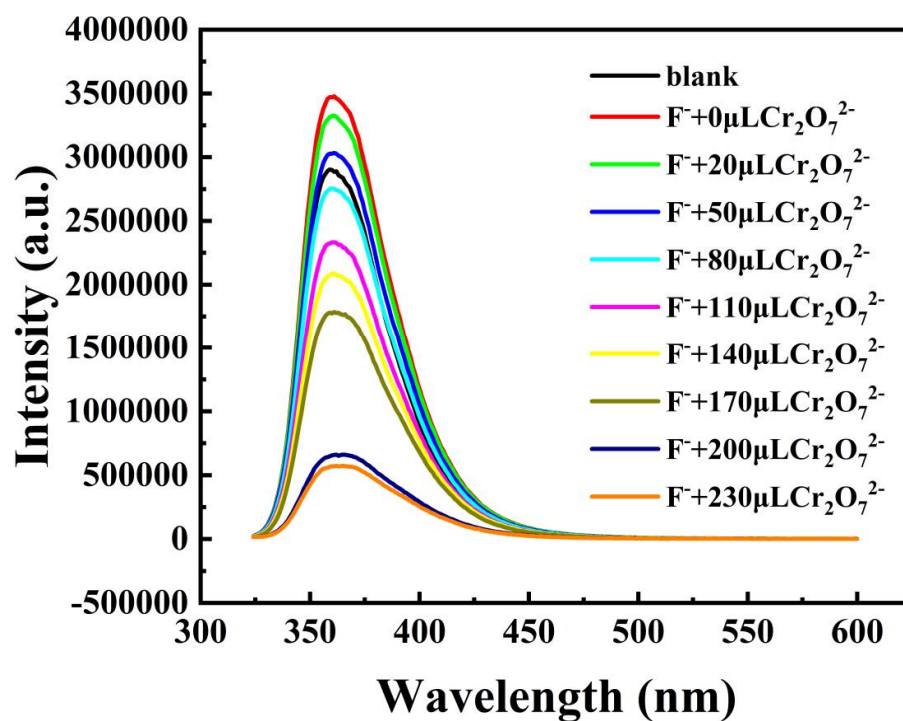

Figure S18. The change of fluorescence intensity of HOF-TCBP after adding  $\text{F}^-$  (230  $\mu\text{L}$ ,  $10^{-3}$  M) and different contents of  $\text{Cr}_2\text{O}_7^{2-}$  ( $10^{-3}$  M).

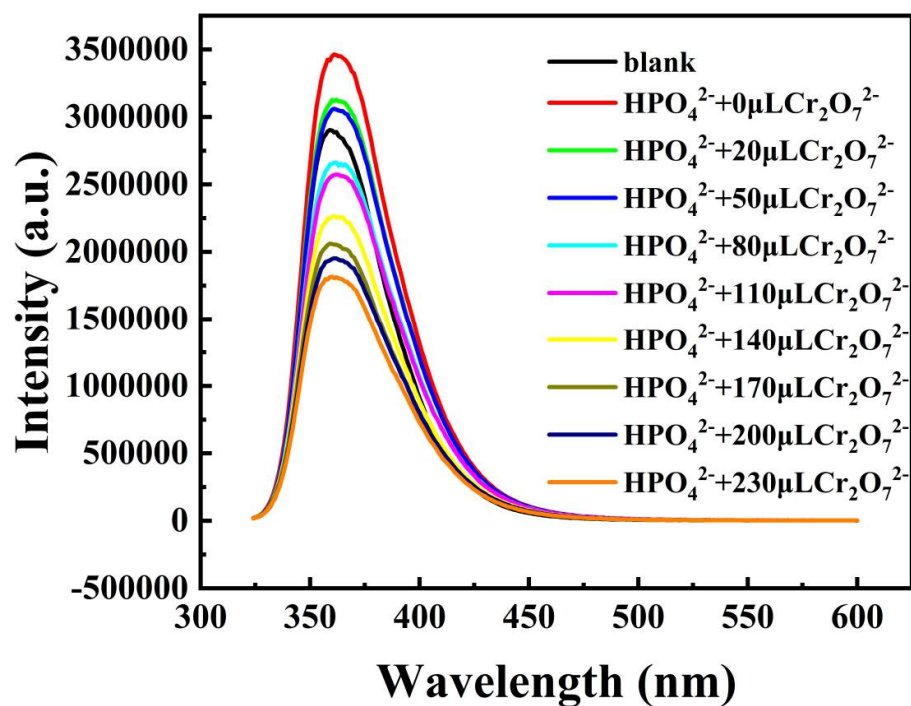

Figure S19. The change of fluorescence intensity of HOF-TCBP after adding  $\text{HPO}_4^{2-}$  (230  $\mu\text{L}$ ,  $10^{-3}$  M) and different contents of  $\text{Cr}_2\text{O}_7^{2-}$  ( $10^{-3}$  M).

M) and different contents of  $\text{Cr}_2\text{O}_7^{2-}$  ( $10^{-3}$  M).

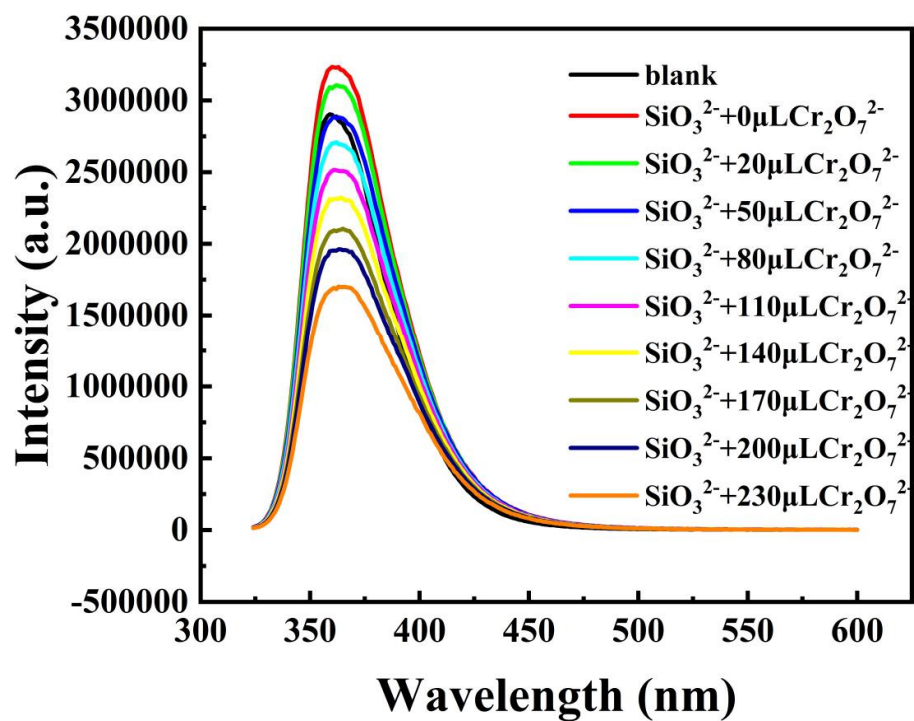

**Figure S20.** The change of fluorescence intensity of HOF-TCBP after adding  $\text{SiO}_3^{2-}$  (230  $\mu\text{L}$ ,  $10^{-3}$  M) and different contents of  $\text{Cr}_2\text{O}_7^{2-}$  ( $10^{-3}$  M).

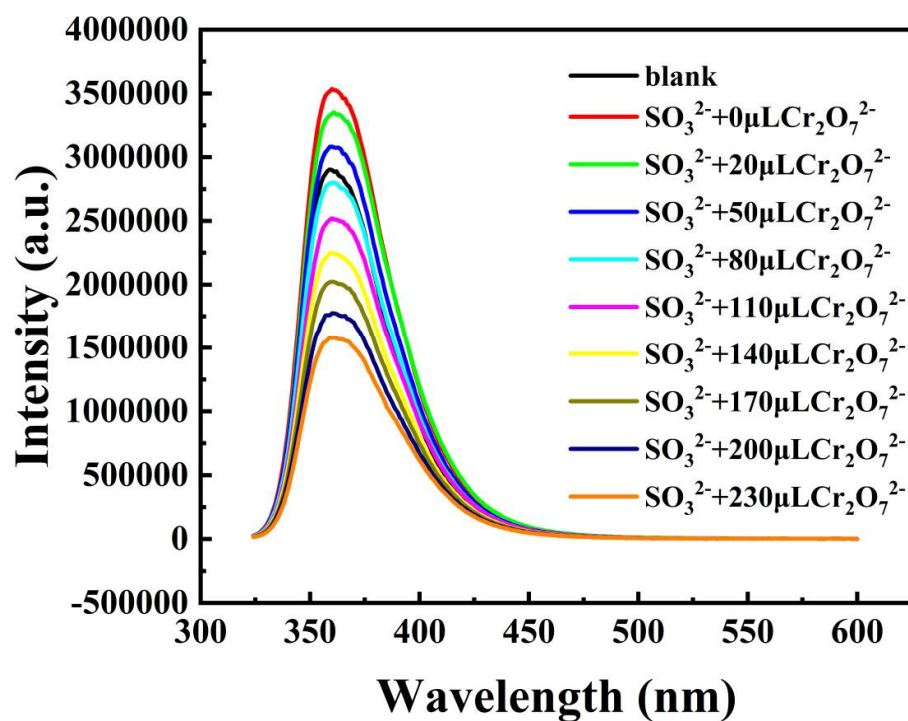

Figure S21. The change of fluorescence intensity of HOF-TCBP after adding  $\text{SO}_3^{2-}$  (230  $\mu\text{L}$ ,  $10^{-3}$  M) and different contents of  $\text{Cr}_2\text{O}_7^{2-}$  ( $10^{-3}$  M).

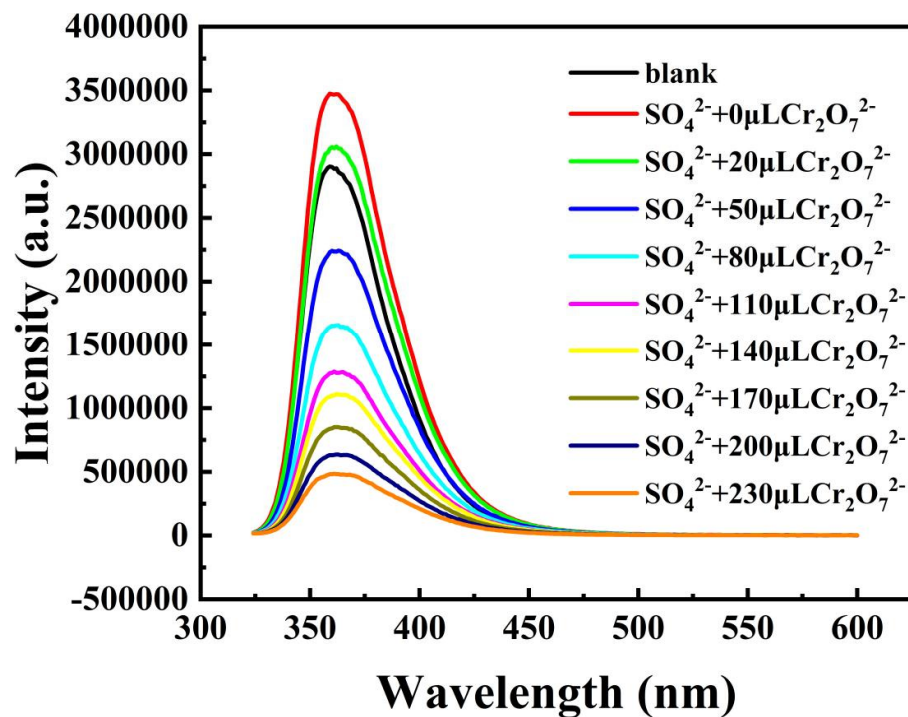

Figure S22. The change of fluorescence intensity of HOF-TCBP after adding  $\text{SO}_4^{2-}$  (230  $\mu\text{L}$ ,  $10^{-3}$  M) and

different contents of  $\text{Cr}_2\text{O}_7^{2-}$  ( $10^{-3}$  M).

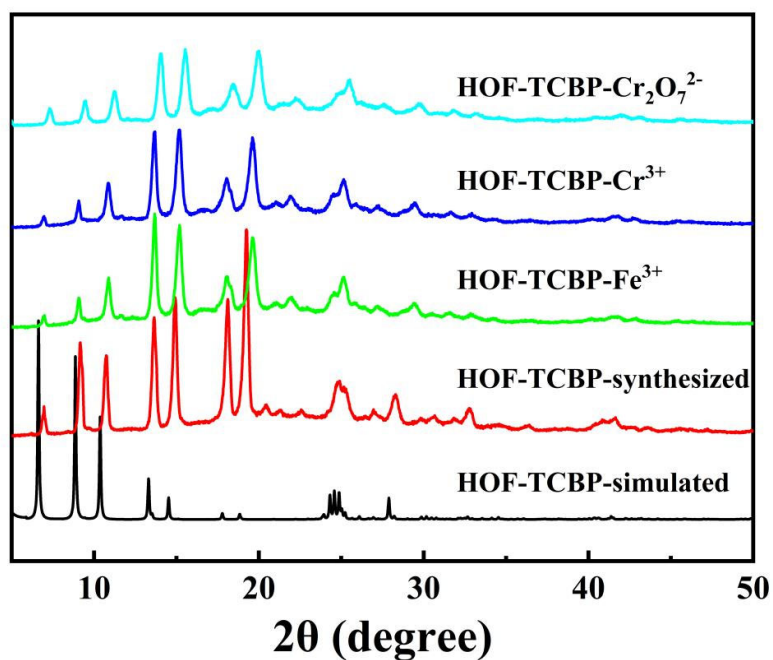

**Figure S23.** PXRD patterns of HOF-TCBP and HOF-TCBP immersed in  $\text{Cr}^{3+}$ ,  $\text{Fe}^{3+}$  and  $\text{Cr}_2\text{O}_7^{2-}$  aqueous solutions ( $10^{-3}$  M).

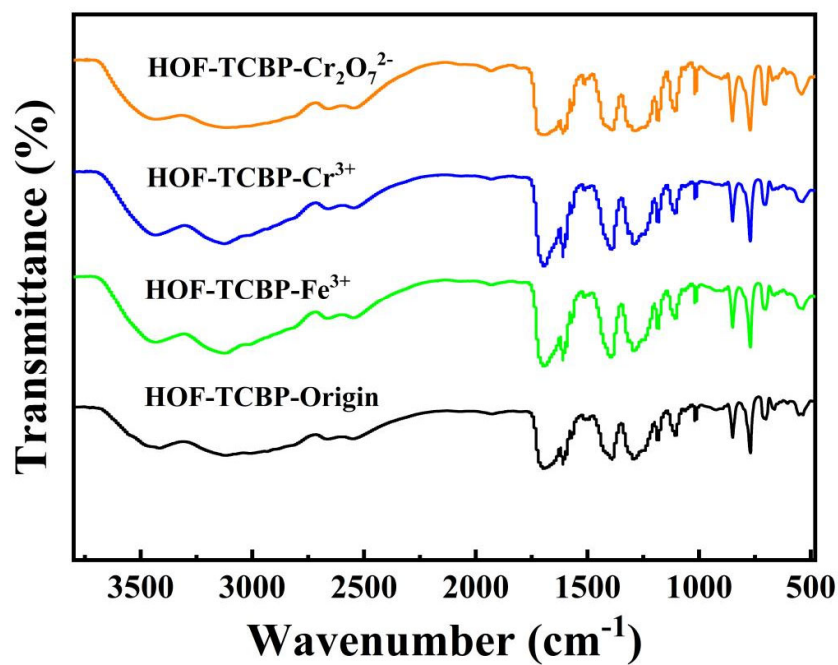

**Figure S24.** FT-IR spectra of HOF-TCBP and HOF-TCBP immersed in  $\text{Cr}^{3+}$ ,  $\text{Fe}^{3+}$  and  $\text{Cr}_2\text{O}_7^{2-}$  aqueous solutions ( $10^{-3}$  M).

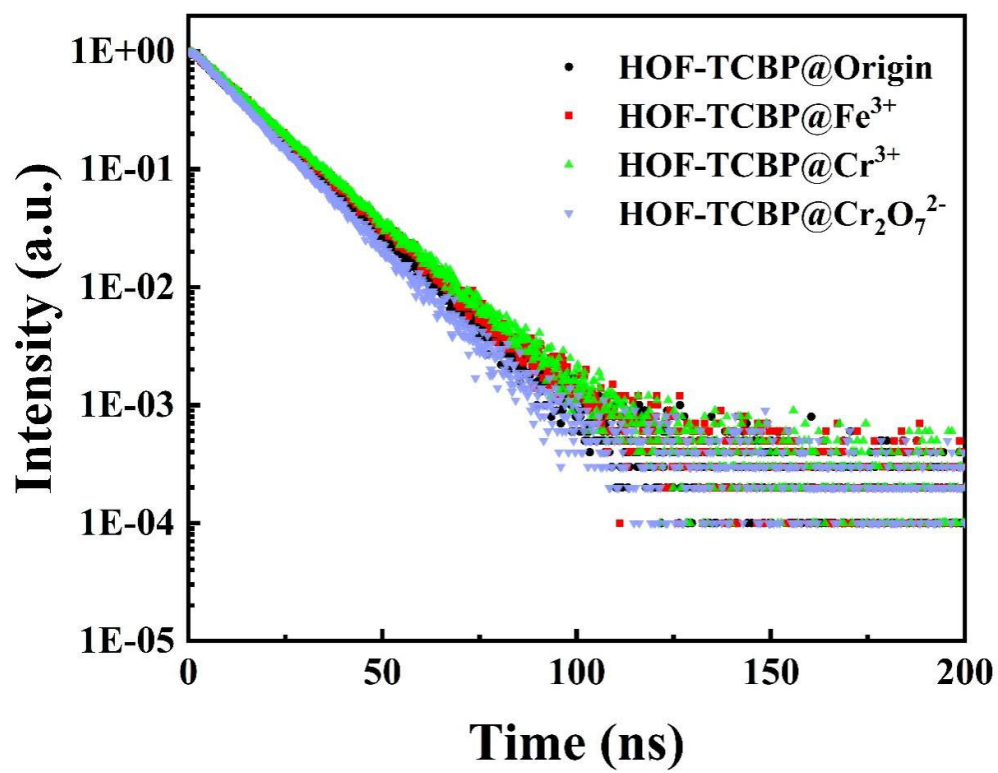

Figure S25. HOF-TCBP fluorescence lifetimes monitored at 359 nm with and without ion addition.



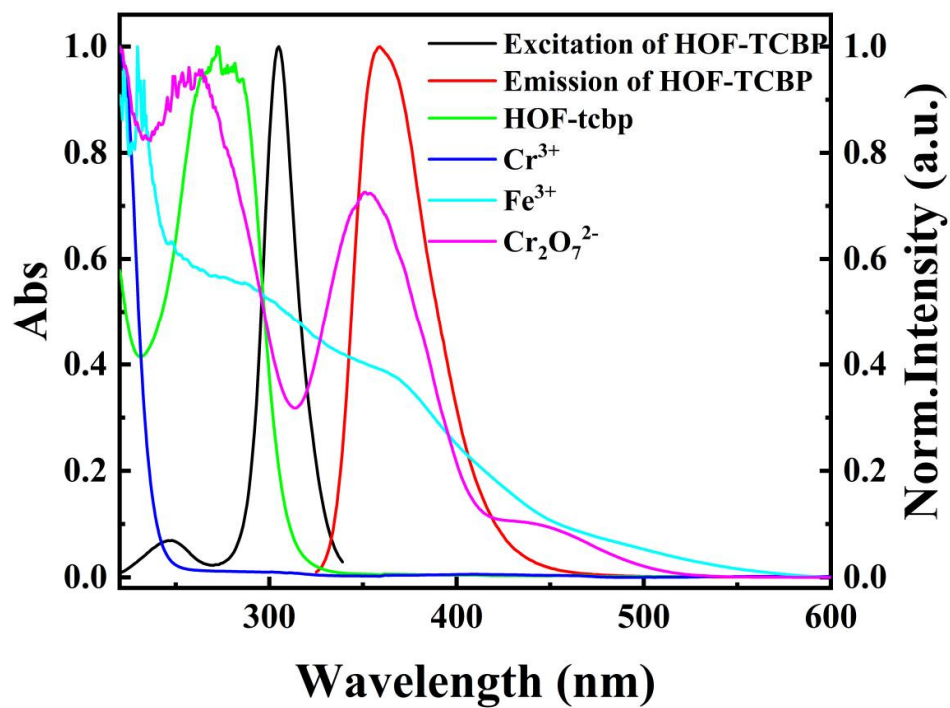

Figure S26. Absorption spectra of ions and excitation and emission spectra of HOF-TCBP.

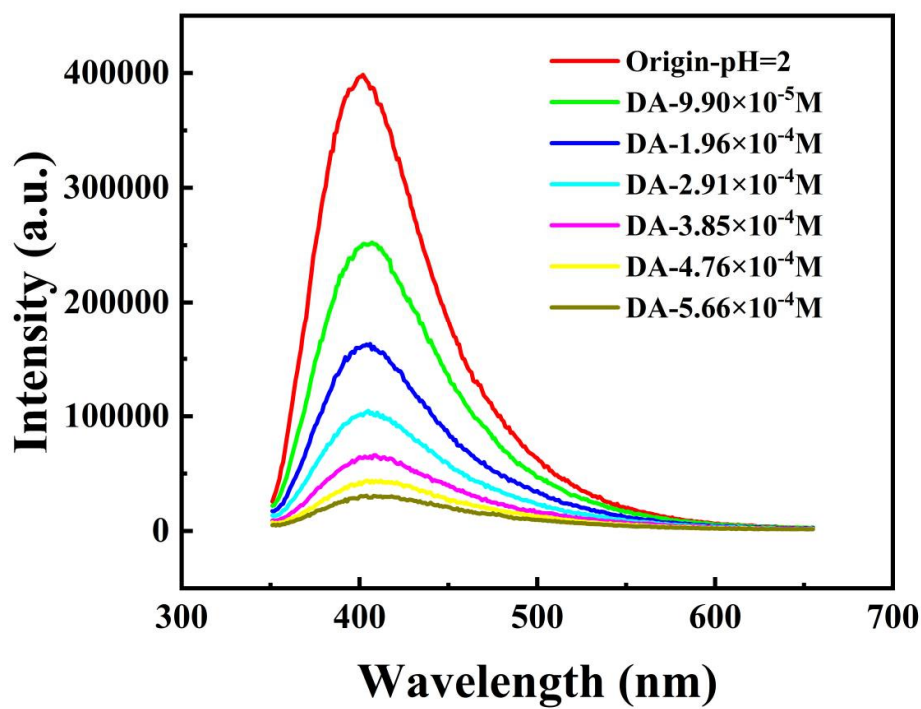

Figure S27. PL spectra of HOF-TCBP with different DA contents in pH=2 buffer solution.

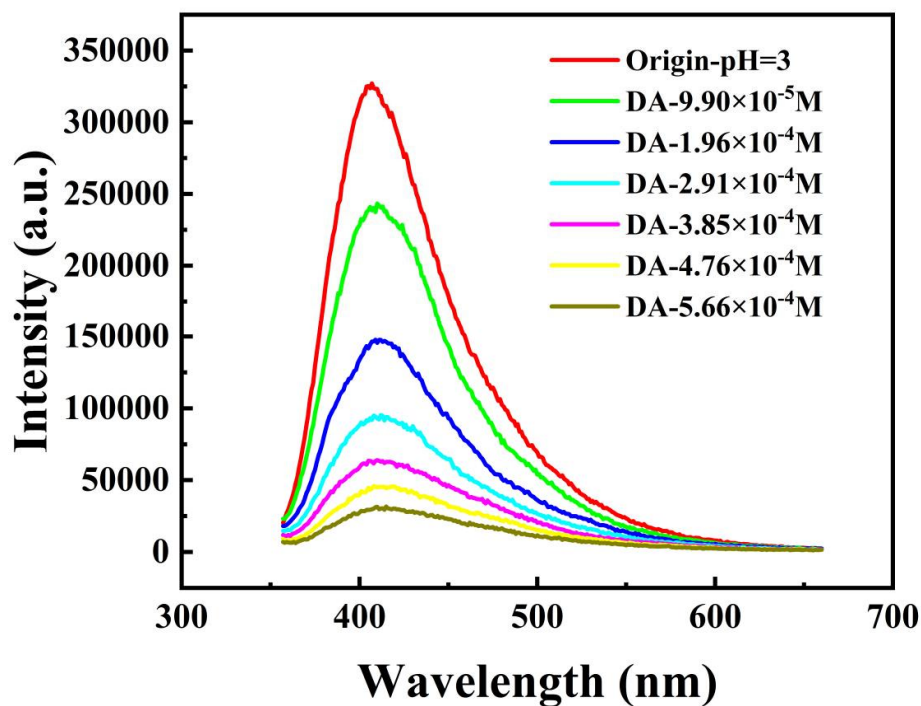

Figure S28. PL spectra of HOF-TCBP with different DA contents in pH = 3 buffer solution.

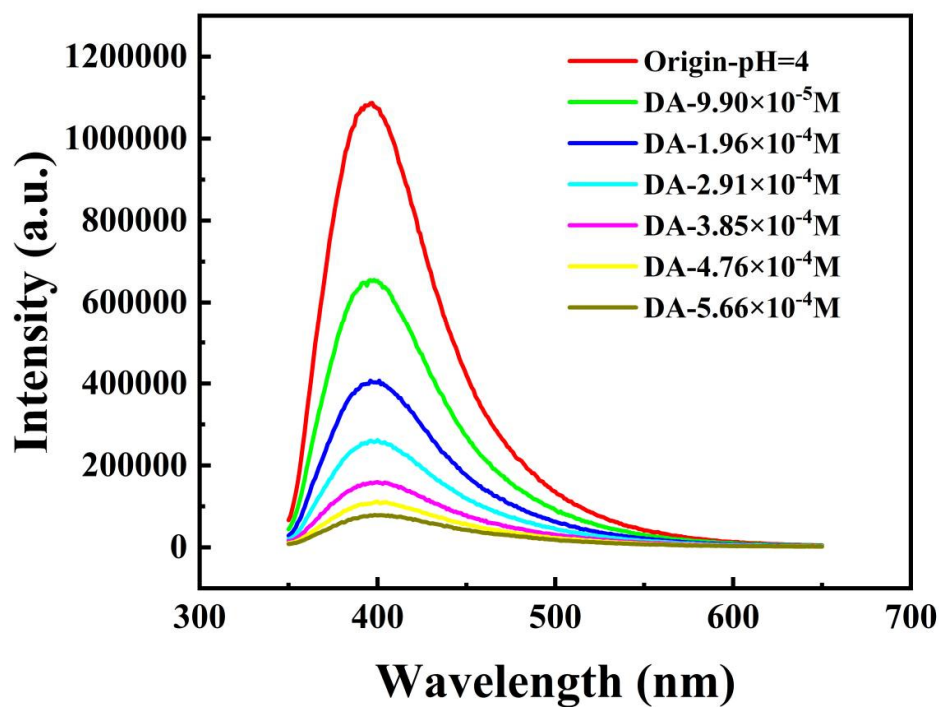

Figure S29. PL spectra of HOF-TCBP with different DA contents in pH = 4 buffer solution.



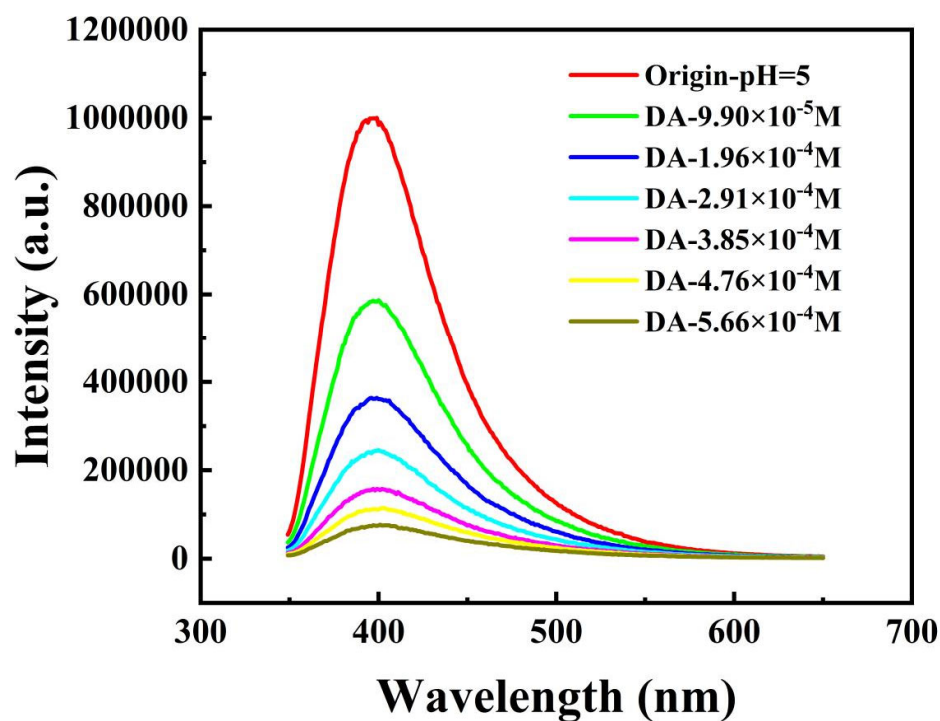

Figure S30. PL spectra of HOF-TCBP with different DA contents in pH = 5 buffer solution.

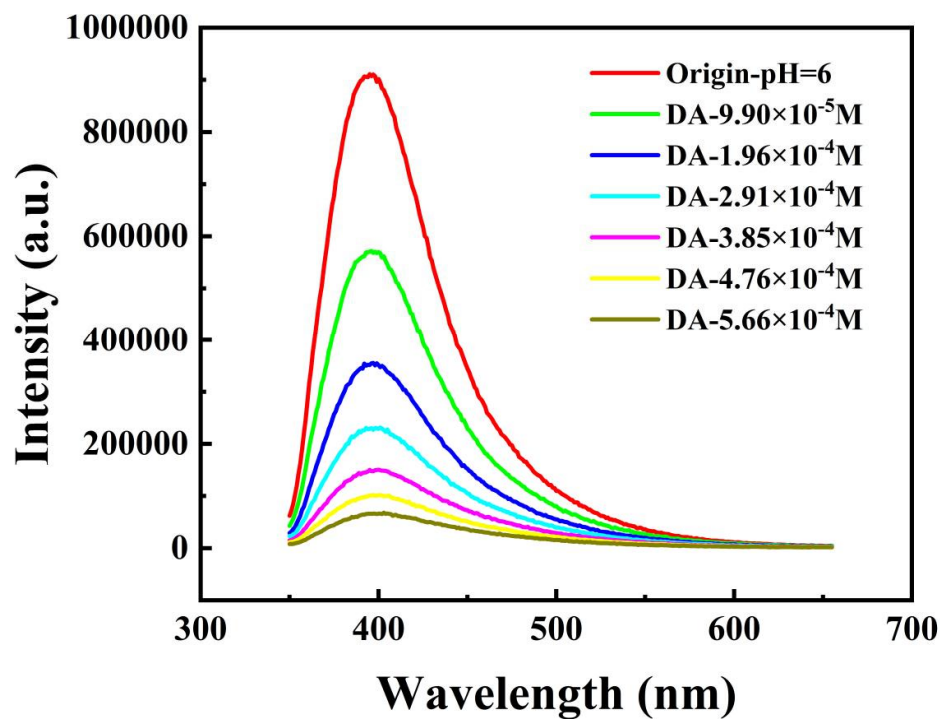

Figure S31. PL spectra of HOF-TCBP with different DA contents in pH = 6 buffer solution.

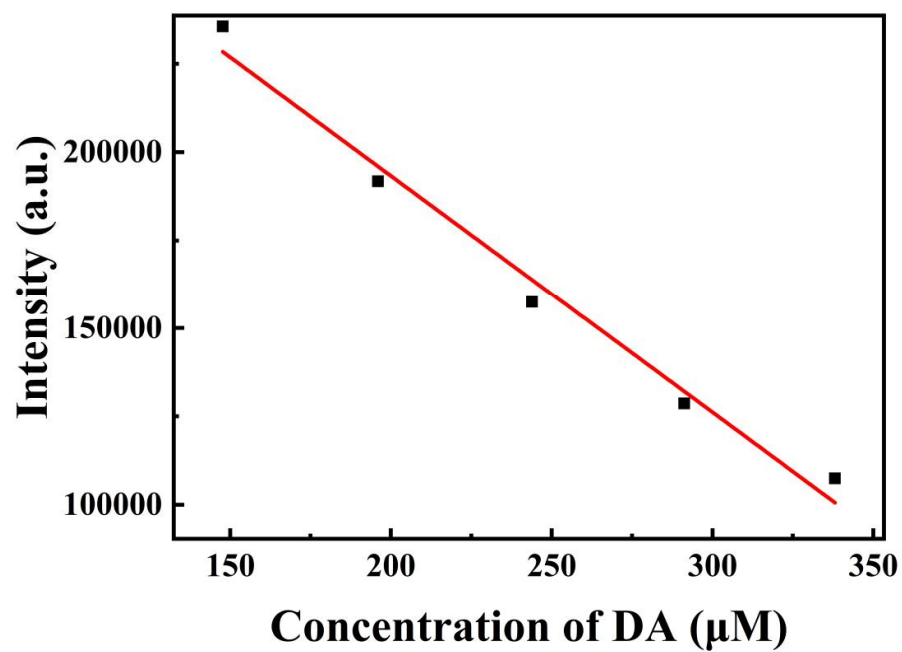

**Figure S32.** The fit curve of HOF-TCBP emission intensity at different DA concentrations.

Linear Equation:  $Y = -671.37516X + 327573.67977$

$S = 6.7137516 \times 10^8 \text{ M}^{-1}$

$$I_a = \frac{573293.7 + 589806.6 + 583444.1 + 583242.7 + 571631.2 + 566931.1 + 581790.5 + 569683.1 + 565883.4 + 580910.8}{10}$$

$= 576661.72$

$$S_b = \sqrt{\frac{\sum (I_0 - I_a)^2}{N-1}} = 8183.077976 \quad (N=8)$$

$$\text{LOD} = \frac{3 \times S_b}{S} = \frac{3 \times 8183.077976}{6.7137516 \times 10^8} = 36.57 \text{ } \mu\text{M}$$

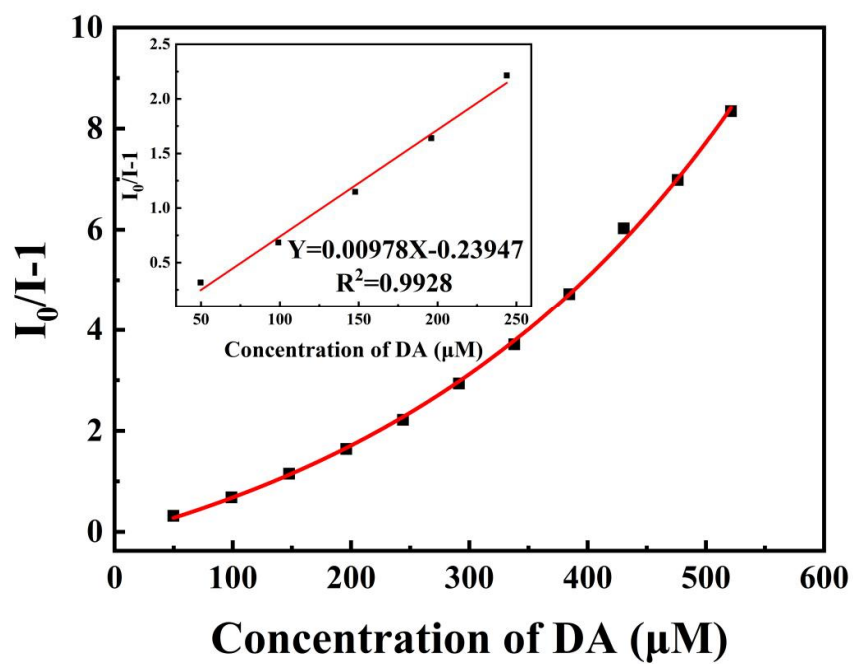

Figure S33. S-V plots of DA; inset: the above figures are the linear fitting curves at low concentrations.

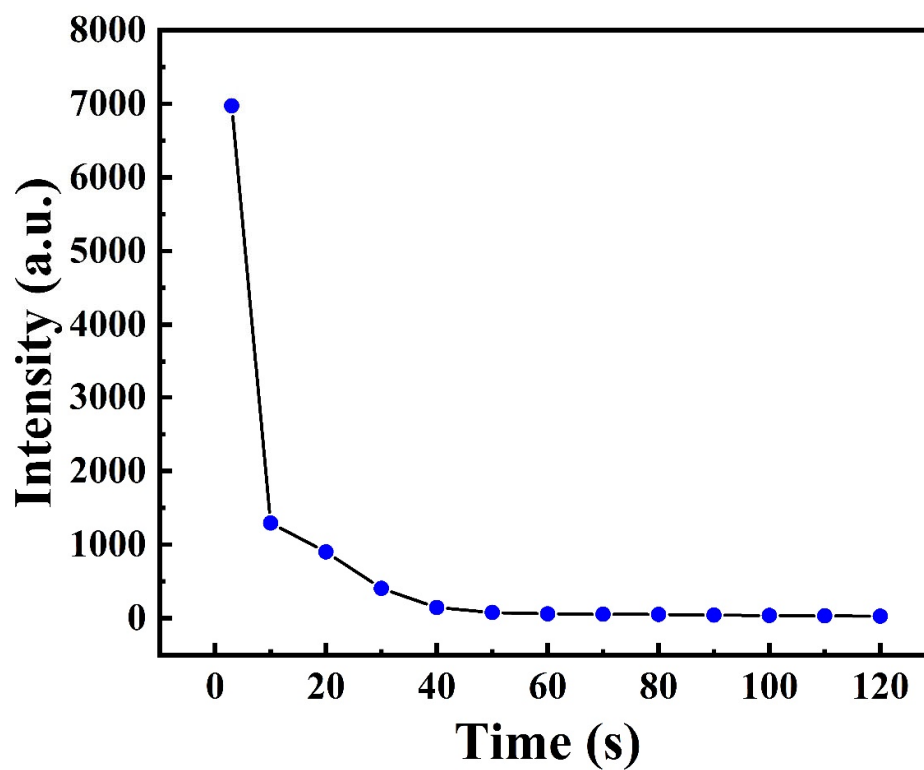

Figure S34. After adding a certain concentration of DA, the luminescence intensity of HOF-TCBP

suspension at 397 nm changes with time.

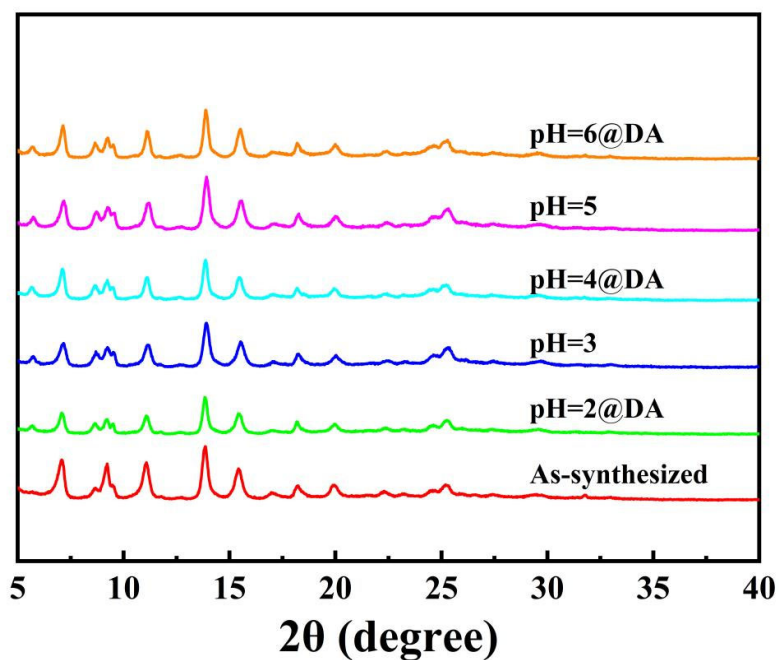

**Figure S35.** PXRD patterns of HOF-TCBP synthesized samples and immersed in pH = 2 - 6 buffer solution and DA solution ( $10^{-2}$  M).

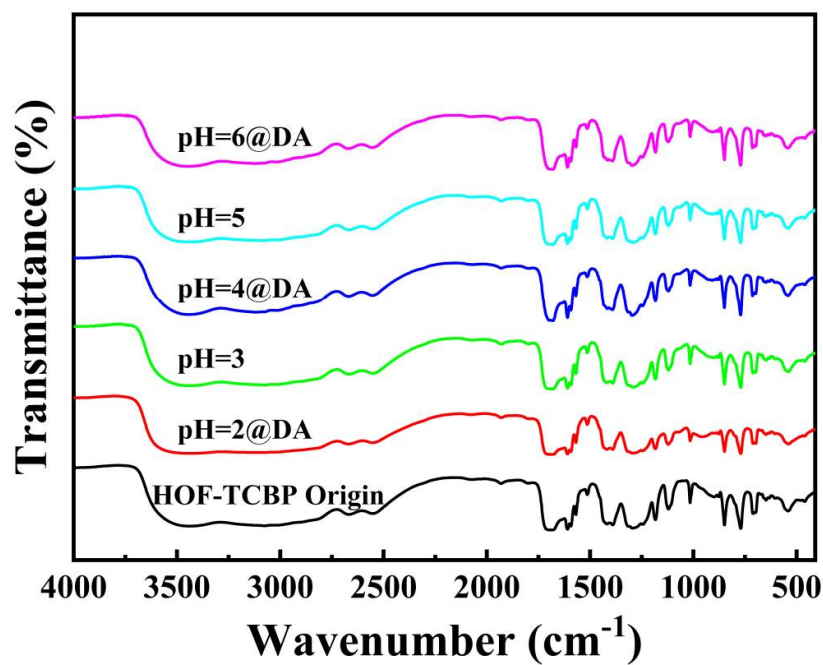

**Figure S36.** FT-IR spectra of HOF-TCBP synthesized samples and immersed in pH = 2 - 6 buffer solution and DA solution ( $10^{-2}$  M).

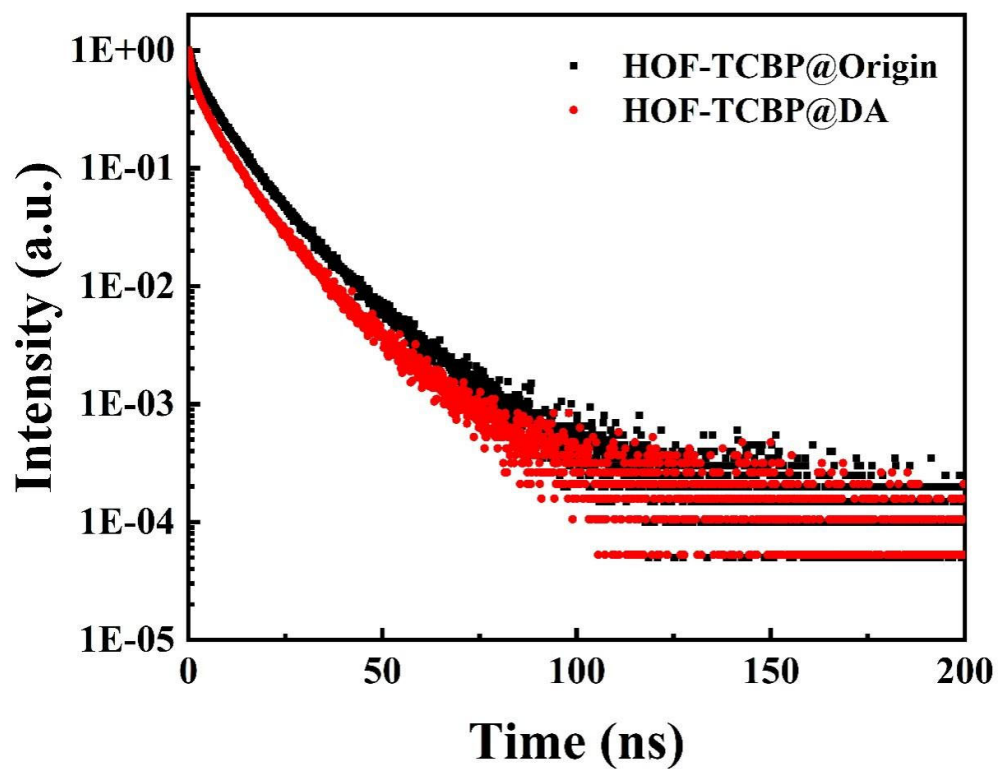

Figure S37. HOF-TCBP fluorescence lifetime monitored at 397 nm without and with DA addition.

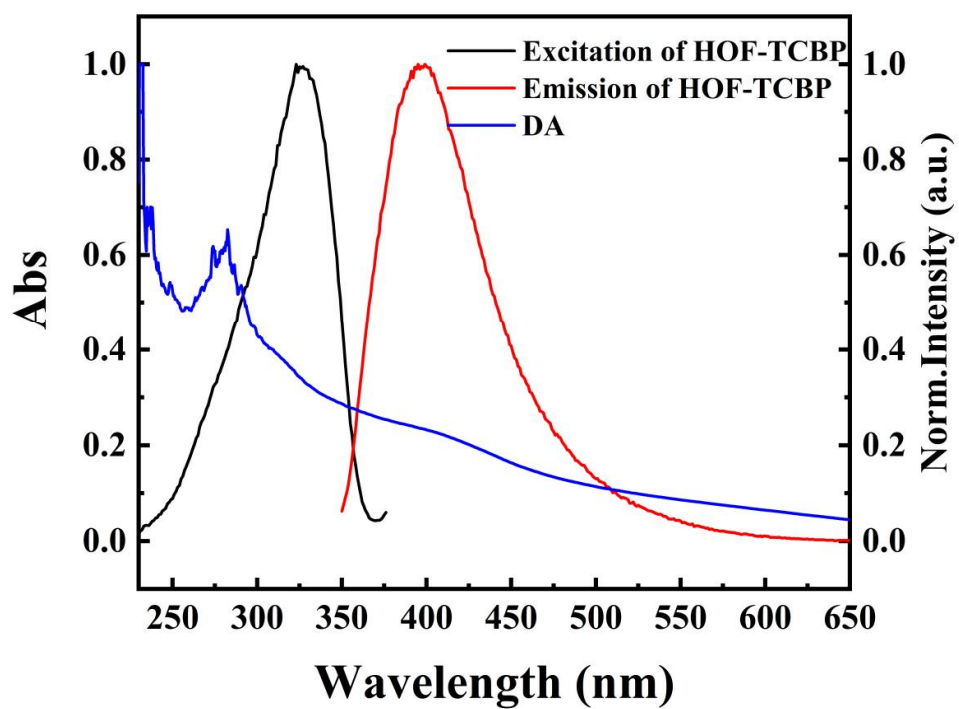

**Figure S38.** Absorption spectra of DA and excitation and emission spectra of HOF-TCBP.**Table S1.** Comparison of luminescent materials for detecting Fe<sup>3+</sup> ion.

| Material                                                                                                           | Solvent          | K <sub>sv</sub> (M <sup>-1</sup> ) | Detection limit(mM) | Ref.             |
|--------------------------------------------------------------------------------------------------------------------|------------------|------------------------------------|---------------------|------------------|
| Ag(bpy)(IPA-OH)                                                                                                    | H <sub>2</sub> O | -                                  | 1.2                 | [1]              |
| Ag(bpy)(IPA-2,6-NDC)                                                                                               | H <sub>2</sub> O | -                                  | 1.8                 | [1]              |
| PAF-5CF                                                                                                            | EtOH             | 11865                              | 38                  | [2]              |
| FJI-C8                                                                                                             | DMF              | 8245                               | 23.3                | [3]              |
| [Eu <sub>2</sub> (ppda) <sub>2</sub> (npdc)(H <sub>2</sub> O) <sub>2</sub> ] <sub>n</sub>                          | H <sub>2</sub> O | 1.64×10 <sup>5</sup>               | 16.6                | [4]              |
| {[Cd <sub>3</sub> (BPDPE)(BDC) <sub>3</sub> ·(DMF) <sub>2</sub> ] <sub>2</sub> DMF·2H <sub>2</sub> O} <sub>n</sub> | DMF              | 8.57×10 <sup>3</sup>               | 10                  | [5]              |
| [Cd <sub>2</sub> (TFBA)(HCOO) (bpe)H <sub>2</sub> O] <sub>n</sub>                                                  | H <sub>2</sub> O | 1.03×10 <sup>6</sup>               | 2.49                | [6]              |
| [Tb(TBOT)(H <sub>2</sub> O)](H <sub>2</sub> O) <sub>4</sub> (DMF)(NMP) <sub>0.5</sub>                              | H <sub>2</sub> O | 5.51×10 <sup>3</sup>               | 130                 | [7]              |
| [Cd(Hcbic)] <sub>n</sub>                                                                                           | H <sub>2</sub> O | 1.8×10 <sup>5</sup>                | 31                  | [8]              |
| [Ln <sub>2</sub> L(1,3-bdc) <sub>3</sub> ] <sub>3</sub> ·5H <sub>2</sub> O                                         | H <sub>2</sub> O | 1.2×10 <sup>4</sup>                | 23                  | [9]              |
| BUT-14                                                                                                             | H <sub>2</sub> O | 2.2×10 <sup>3</sup>                | 3.8                 | [10]             |
| BUT-15                                                                                                             | H <sub>2</sub> O | 1.7×10 <sup>4</sup>                | 0.3                 | [10]             |
| <b>HOF-TCBP</b>                                                                                                    | <b>Ethanol</b>   | <b>3.01×10<sup>4</sup></b>         | <b>2.516</b>        | <b>This work</b> |

**Table S2.** Comparison of luminescent materials for detecting Cr<sup>3+</sup> ion.

| Material                                                                                                      | Solvent                              | K <sub>sv</sub> (M <sup>-1</sup> ) | Detection limit(mM) | Ref.             |
|---------------------------------------------------------------------------------------------------------------|--------------------------------------|------------------------------------|---------------------|------------------|
| [Eu <sub>2</sub> (ppda) <sub>2</sub> (npdc)(H <sub>2</sub> O)]·H <sub>2</sub> O                               | H <sub>2</sub> O                     | 1.98×10 <sup>6</sup>               | 61.7                | [3]              |
| [Zn(L)(H <sub>2</sub> O)]·H <sub>2</sub> O                                                                    | H <sub>2</sub> O                     | 2.03×10 <sup>4</sup>               | 2.44                | [11]             |
| {[Zn <sub>2</sub> (μ <sub>3</sub> -OH)(cpta)(4,4'-bipy)]·H <sub>2</sub> O} <sub>n</sub>                       | H <sub>2</sub> O                     | 9.47×10 <sup>3</sup>               | 5.55                | [12]             |
| [Zn <sub>2</sub> (TPOM)(BDC) <sub>2</sub> ] <sub>4</sub> ·4H <sub>2</sub> O                                   | DMF                                  | -                                  | 4.9                 | [13]             |
| [Eu <sub>2</sub> (tpbpc) <sub>4</sub> ·CO <sub>3</sub> ·H <sub>2</sub> O]·DMF·solvent                         | H <sub>2</sub> O                     | 5.14×10 <sup>2</sup>               | 3.64                | [14]             |
| Zn <sub>3</sub> (bpdc) <sub>2</sub> (pdc)(DMF)·6DMF                                                           | H <sub>2</sub> O                     | 3.87×10 <sup>3</sup>               | 25.1                | [15]             |
| [Zn (tbda)] <sub>n</sub>                                                                                      | H <sub>2</sub> O                     | 2.68×10 <sup>3</sup>               | 180                 | [16]             |
| YF <sub>3</sub> : Eu <sup>3+</sup> nanoparticles                                                              | H <sub>2</sub> O                     | 6.458×10 <sup>3</sup>              | 1.88                | [17]             |
| PVP@Gd <sub>2</sub> O <sub>3</sub> :Eu <sup>3+</sup> NPs                                                      | H <sub>2</sub> O                     | -                                  | 2.1                 | [18]             |
| S/N-CQDs                                                                                                      | H <sub>2</sub> O                     | -                                  | 6.0                 | [19]             |
| {[Cd <sub>2</sub> (adc) <sub>2</sub> (4-nvp) <sub>6</sub> ] <sub>3</sub> ·MeOH·H <sub>2</sub> O} <sub>n</sub> | CH <sub>3</sub> CN /H <sub>2</sub> O | -                                  | 0.31                | [20]             |
| <b>HOF-TCBP</b>                                                                                               | <b>Ethanol</b>                       | <b>8.5×10<sup>4</sup></b>          | <b>0.689</b>        | <b>This work</b> |

**Table S3.** Comparison of luminescent materials for detecting Cr<sub>2</sub>O<sub>7</sub><sup>2-</sup> ion.

| Material                                                                    | Solvent          | K <sub>sv</sub> (M <sup>-1</sup> ) | Detection limit(mM) | Ref. |
|-----------------------------------------------------------------------------|------------------|------------------------------------|---------------------|------|
| Zn-MOF-1                                                                    | H <sub>2</sub> O | 2.07×10 <sup>4</sup>               | 3.53                | [11] |
| [Zn <sub>2</sub> (TPOM)(BDC) <sub>2</sub> ] <sub>4</sub> ·4H <sub>2</sub> O | DMF              | 7.59×10 <sup>3</sup>               | 3.9                 | [13] |

|                                                                                       |                  |                            |              |                  |
|---------------------------------------------------------------------------------------|------------------|----------------------------|--------------|------------------|
| Eu <sub>4</sub> L <sub>3</sub>                                                        | DMF              | 1.526×10 <sup>3</sup>      | 10           | [21]             |
| 1-Eu                                                                                  | Ethanol          | -                          | 22           | [22]             |
| [Eu <sub>2</sub> (tpbpc) <sub>4</sub> ·CO <sub>3</sub> ·H <sub>2</sub> O]·DMF·solvent | H <sub>2</sub> O | 1.04×10 <sup>4</sup>       | 4.95         | [14]             |
| [Tb(TATAB)(H <sub>2</sub> O) <sub>2</sub> ]·NMP·H <sub>2</sub> O] <sub>n</sub>        | H <sub>2</sub> O | -                          | 1.0          | [23]             |
| [Zn <sub>2</sub> (4,4'-nba) <sub>2</sub> (1,4-bib) <sub>2</sub> ] <sub>n</sub>        | H <sub>2</sub> O | 6.7×10 <sup>3</sup>        | 3.8          | [24]             |
| [Zn(IPA)(3-PN)] <sub>n</sub>                                                          | H <sub>2</sub> O | 1.37×10 <sup>3</sup>       | 12           | [25]             |
| [Cd(IPA)(3-PN)] <sub>n</sub>                                                          | H <sub>2</sub> O | 2.91×10 <sup>3</sup>       | 2.26         | [25]             |
| <b>HOF-TCBP</b>                                                                       | <b>Ethanol</b>   | <b>3.62×10<sup>4</sup></b> | <b>1.638</b> | <b>This work</b> |

## References:

- [1] Van Nguyen, C. ; Matsagar, B.M.; Ahamad, T.; Alshehri, S.M.; Chiang, W.-H.; Wu, K.C.W. Unraveling the highly selective nature of silver-based metal–organic complexes for the detection of metal ions: the synergistic effect of dicarboxylic acid linkers. *J. Mater. Chem. C* **2020**, *8*, 5051–5057.
- [2] Ma, T.; Zhao, X.; Matsuo, Y.; Song, J.; Zhao, R.; Faheem, M.; Chen, M.; Zhang, Y.; Tian, Y.; Zhu, G. Fluorescein-based fluorescent porous aromatic framework for Fe<sup>3+</sup> detection with high sensitivity. *J. Mater. Chem. C* **2019**, *7*, 2327–2332.
- [3] Zhan, Z.; Liang, X.; Zhang, X.; Jia, Y.; Hu, M. A water-stable europium-MOF as a multifunctional luminescent sensor for some trivalent metal ions (Fe(3+), Cr(3+), Al(3+)), PO<sub>4</sub>(3-) ions, and nitroaromatic explosives. *Dalton Trans.* **2019**, *48*, 1786–1794.
- [4] Chen, C.H.; Wang, X.S.; Li, L.; Huang, Y.B.; Cao, R. Highly selective sensing of Fe(3+) by an anionic metal-organic framework containing uncoordinated nitrogen and carboxylate oxygen sites. *Dalton Trans.* **2018**, *47*, 3452–3458.
- [5] Hu, J.; Cheng, T.; Dong, S.; Zhou, C.; Huang, X.; Zhang, L. Multifunctional luminescent Cd (II)-based metal-organic framework material for highly selective and sensitive sensing 2,4,6-trinitrophenol (TNP) and Fe<sup>3+</sup> cation. *Microporous Mesoporous Mater.* **2018**, *272*, 177–183.
- [6] Ru, J.; Zhang, R.-F.; Li, X.-Y.; Wang, Y.-X.; Li, L.-L.; Ma, C.-L. Multi-responsive luminescent probes for Fe<sup>3+</sup>, Cr<sub>2</sub>O<sub>7</sub><sup>2-</sup> and acetylacetone with Cd-MOF based on tris(3'-F-4'-carboxybiphenyl)amine and trans-1,2-bis(4-pyridyl)ethene. *J. Solid State Chem.* **2022**, *307*, 122820.
- [7] Chen, M.; Xu, W.-M.; Tian, J.-Y.; Cui, H.; Zhang, J.-X.; Liu, C.-S.; Du, M. A terbium(iii) lanthanide–organic framework as a platform for a recyclable multi-responsive luminescent sensor. *J. Mater. Chem. C* **2017**, *5*, 2015–2021.
- [8] Li, F.-F.; Zhu, M.-L.; Lu, L.-P. A luminescent Cd(II)-based metal–organic framework for detection of Fe(III) ions in aqueous solution. *J. Solid State Chem.* **2018**, *261*, 31–36.
- [9] Gai, Y.L.; Guo, Q.; Zhao, X.Y.; Chen, Y.; Liu, S.; Zhang, Y.; Zhuo, C.X.; Yao, C.; Xiong, K.C. Extremely stable europium-organic framework for luminescent sensing of Cr<sub>2</sub>O<sub>7</sub>(2-) and Fe(3+) in aqueous systems. *Dalton Trans.* **2018**, *47*, 12051–12055.

- [10] Wang B.; Yang, Q.; Guo, C.; Sun, Y.; Xie, L.H. J.; Li, R. Stable Zr(IV)-Based Metal-Organic Frameworks with Predesigned Functionalized Ligands for Highly Selective Detection of Fe(III) Ions in Water. *ACS Appl. Mater. Interfaces* **2017**, *9*, 10286–10295.
- [11] Guo, X.-Y.; Zhao, F.; Liu, J.-J.; Liu, Z.-L.; Wang, Y.-Q. An ultrastable zinc(ii)–organic framework as a recyclable multi-responsive luminescent sensor for Cr(iii), Cr(vi) and 4-nitrophenol in the aqueous phase with high selectivity and sensitivity. *J. Mater. Chem. A* **2017**, *5*, 20035–20043.
- [12] Jin, H.; Xu, J.; Zhang, L.; Ma, B.; Shi, X.; Fan, Y.; Wang, L. Multi-responsive luminescent sensor based on Zn (II) metal-organic framework for selective sensing of Cr(III), Cr(VI) ions and p-nitrotoluene. *J. Solid State Chem.* **2018**, *268*, 168–174.
- [13] Lv, R.; Wang, J.; Zhang, Y.; Li, H.; Yang, L.; Liao, S.; Gu, W.; Liu, X. An amino-decorated dual-functional metal–organic framework for highly selective sensing of Cr(iii) and Cr(vi) ions and detection of nitroaromatic explosives. *J. Mater. Chem. A* **2016**, *4*, 15494–15500.
- [14] Liu, J.; Ji, G.; Xiao, J.; Liu, Z. Ultrastable 1D Europium Complex for Simultaneous and Quantitative Sensing of Cr(III) and Cr(VI) Ions in Aqueous Solution with High Selectivity and Sensitivity. *Inorg. Chem.* **2017**, *56*, 4197–4205.
- [15] Meng, X.; Wei, M.J.; Wang, H.N.; Zang, H.Y.; Zhou, Z.Y. Multifunctional luminescent Zn(ii)-based metal-organic framework for high proton-conductivity and detection of Cr(3+) ions in the presence of mixed metal ions. *Dalton Trans.* **2018**, *47*, 1383–1387.
- [16] Liang, X.; Jia, Y.; Zhan, Z.; Hu, M. A highly selective multifunctional Zn-coordination polymer sensor for detection of Cr (III), Cr (VI) ion, and TNP molecule. *Appl. Organomet. Chem.* **2019**, *33*, e4988.
- [17] Li, L.; Chen, F.-F.; Pan, J.; Zhong, S.; Li, L.; Yu, Y. Amino-functionalized YF<sub>3</sub>:Eu<sup>3+</sup> nanoparticles: A selective two-in-one fluorescent probe for Cr(III) and Cr(VI) detection. *J. Lumin.* **2020**, *226*, 117440.
- [18] Vashistha, N.; Chandra, A.; Singh, M. HSA functionalized Gd<sub>2</sub>O<sub>3</sub>:Eu<sup>3+</sup> nanoparticles as an MRI contrast agent and a potential luminescent probe for Fe<sup>3+</sup>, Cr<sup>3+</sup>, and Cu<sup>2+</sup> detection in water. *New J. Chem.* **2020**, *44*, 14211–14227.
- [19] Wang, C.; Xu, J.; Li, H.; Zhao, W. Tunable multicolour S/N co-doped carbon quantum dots synthesized from waste foam and application to detection of Cr(3+) ions. *Luminescence* **2020**, *35*, 1373–1383.
- [20] Dutta, B.; Jana, R.; Bhanja, A.K.; Ray, P.P.; Sinha, C.; Mir, M.H. Supramolecular Aggregate of Cadmium(II)-Based One-Dimensional Coordination Polymer for Device Fabrication and Sensor Application. *Inorg. Chem.* **2019**, *58*, 2686–2694.
- [21] Liu, W.; Huang, X.; Xu, C.; Chen, C.; Yang, L.; Dou, W.; Chen, W.; Yang, H.; Liu, W. A Multi-responsive Regenerable Europium-Organic Framework Luminescent Sensor for Fe(3+) , Cr(VI) Anions, and Picric Acid. *Chemistry* **2016**, *22*, 18769–18776.



- [22] Li, G.P.; Liu, G.; Li, Y.Z.; Hou, L.; Wang, Y.Y.; Zhu, Z. Uncommon Pyrazoyl-Carboxyl Bifunctional Ligand-Based Microporous Lanthanide Systems: Sorption and Luminescent Sensing Properties. *Inorg. Chem.* **2016**, *55*, 3952–3959.
- [23] Wen, G.X.; Han, M.L.; Wu, X.Q.; Wu, Y.P.; Dong, W.W.; Zhao, J.; Li, D.S.; Ma, L.F. A multi-responsive luminescent sensor based on a super-stable sandwich-type terbium(iii)-organic framework. *Dalton Trans.* **2016**, *45*, 15492–15499.
- [24] Xu, T.-Y.; Li, J.-M.; Han, Y.-H.; Wang, A.-R.; He, K.-H.; Shi, Z.-F. A new 3D four-fold interpenetrated dia-like luminescent Zn(ii)-based metal–organic framework: the sensitive detection of Fe<sup>3+</sup>, Cr<sub>2</sub>O<sub>7</sub><sup>2-</sup>, and CrO<sub>4</sub><sup>2-</sup> in water, and nitrobenzene in ethanol. *New J. Chem.* **2020**, *44*, 4011–4022.
- [25] Parmar, B.; Rachuri, Y.; Bisht, K.K.; Laiya, R.; Suresh, E. Mechanochemical and Conventional Synthesis of Zn(II)/Cd(II) Luminescent Coordination Polymers: Dual Sensing Probe for Selective Detection of Chromate Anions and TNP in Aqueous Phase. *Inorg. Chem.* **2017**, *56*, 2627–2638.
